# Supplementary material
Source: PubMed Central journal article supplement (PMC2576541)
Supplement: M806592200_1.pdf [file M806592200_1.pdf]

**Supplemental Material:**

**Supplemental Fig. 1 The effect of AG1478 on Tubulin, cellular pH and ATP level.** H4 cells were treated with DMSO (a,d,g) for 1 h, or 14  $\mu$ M AG1478 (b,e,h) for 1 h, or 10  $\mu$ M Nocodazole (c) for 1 h, or 500 nM Bafilomycin A1 (f) for 1 h, or 50 mM DOG+0.05 %NaN<sub>3</sub> (i) for 30 min. Cells were stained with an antibody against tubulin (a,b,c), or  $\beta$ -COP (g,h,i), or an dye lysotracker (d,e,f). (j) H4 cells were treated with DMSO, AG1478, BFA and DOG/NaN<sub>3</sub> for 30 min and the levels of ATP were determined with Sigma ATP Bioluminescent Assay kit. Bar, 10  $\mu$ m.

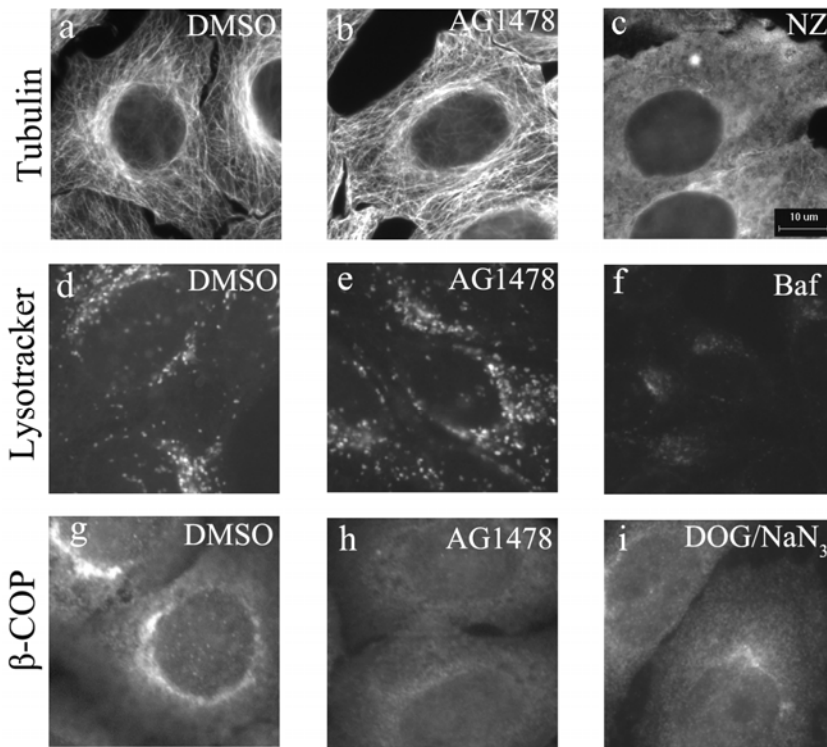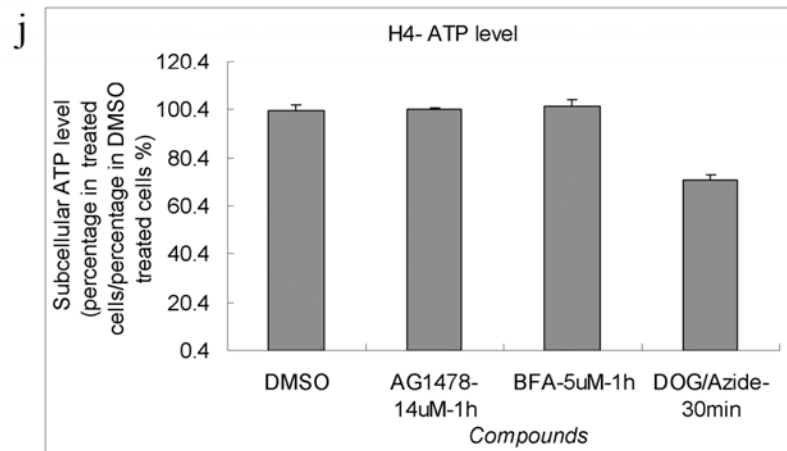

**Supplemental Fig. 2 The effect of AG1478 or BFA on cell viability.** H4 cells were treated with DMSO, 5  $\mu$ M BFA, 14  $\mu$ M AG1478 alone or with z-VAD together as indicated for 24 h or 48 h, performed by MTT assay. Numbers represent viability normalized to that of 0.1% DMSO treated cells.

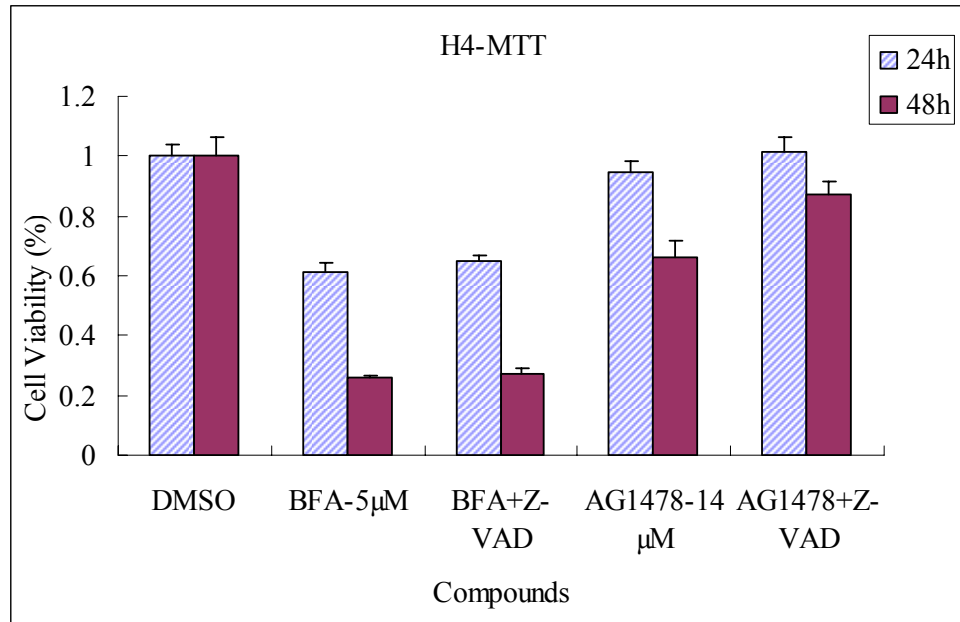

**Supplemental Fig. 3 The example processed images for analysis by CellProfiler.**

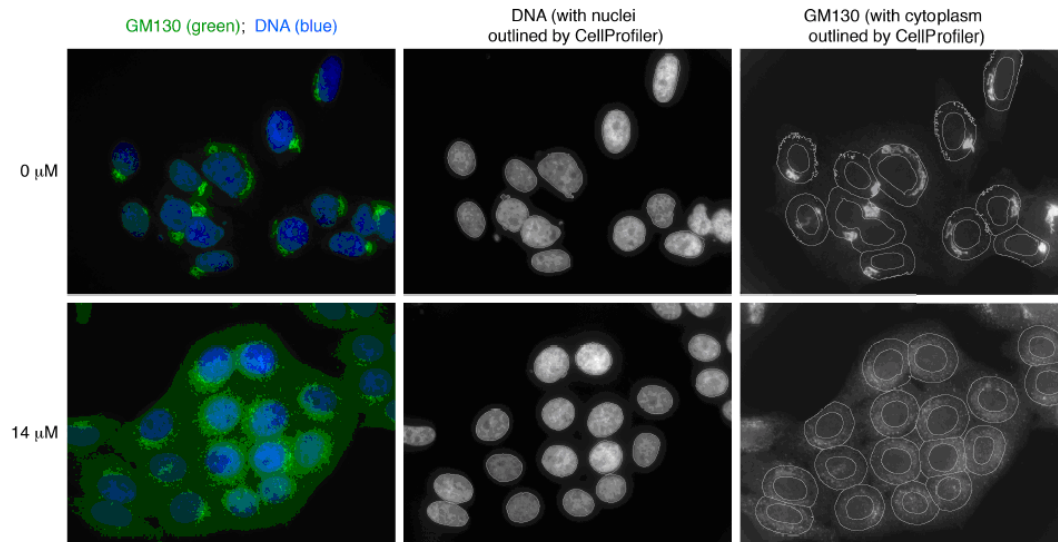

**Supplemental Table 1. The effect of AG1478 or BFA on Golgi in cell lines**

|              | cell lines | AG1478<br>(28 $\mu$ M $\approx$ 10 $\mu$ g/ml) | BFA (5 $\mu$ M) |
|--------------|------------|------------------------------------------------|-----------------|
| Human        | H4         | √                                              | √               |
|              | HeLa       | √                                              | √               |
|              | HepG2      | √                                              | √               |
|              | A549       | √                                              | √               |
|              | 293T       | √                                              | √               |
|              | Hs 578Bst  | √                                              | √               |
| Mouse        | NIH 3T3    | ×                                              | √               |
|              | MEFs       | ×                                              | √               |
|              | B16        | ×                                              | √               |
|              | P19        | ×                                              | √               |
|              | L929       | ×                                              | √               |
| Rat          | NRK        | ×                                              | √               |
|              | Rat2       | ×                                              | √               |
|              | Rat1       | ×                                              | √               |
|              | PC12       | ×                                              | √               |
| Kangaroo rat | PtK1       | ×                                              | ×               |
| Dog          | MDCK       | ×                                              | ×               |

("√" represents compounds that have a dispersal effect on Golgi in cell lines; "×" represents compounds that have no dispersal effect on Golgi in cell lines;)
